# Supplementary material
Source: PubMed Central journal article supplement (PMC6662634)
Supplement: NIHMS1533331-supplement-11.pdf [file NIHMS1533331-supplement-11.pdf]

**Table S1. Cryo-EM data collection and refinement statistics, Related to Figure 2.**

| <b>Data collection</b>                           |                       |        |     |     |
|--------------------------------------------------|-----------------------|--------|-----|-----|
| Microscope                                       | FEI Titan Krios       |        |     |     |
| Voltage (kV)                                     | 300                   |        |     |     |
| Camera                                           | Gatan K2 Summit       |        |     |     |
| Magnification                                    | 37,000                |        |     |     |
| Nominal defocus range ( $\mu\text{m}$ )          | 0.63-3.30             |        |     |     |
| Defocus mean $\pm$ std ( $\mu\text{m}$ )         | 1.81 $\pm$ 0.52       |        |     |     |
| Exposure time (s)                                | 8                     |        |     |     |
| Number of frames                                 | 80                    |        |     |     |
| Dose rate ( $\text{e}^-/\text{Pixel}/\text{s}$ ) | 4.55                  |        |     |     |
| Total dose ( $\text{e}^-/\text{\AA}^2$ )         | 58                    |        |     |     |
| Pixel size ( $\text{\AA}$ )                      | 0.79                  |        |     |     |
|                                                  | Tilt angle            |        |     |     |
| Micrographs collected                            | 0°                    | 10°    | 20° | 30° |
|                                                  | 998                   | 736    | 967 | 741 |
| Micrographs processed                            | 3368                  |        |     |     |
| Total particles                                  | 401,889               |        |     |     |
| <b>Reconstruction (RELION)</b>                   |                       |        |     |     |
|                                                  | Pre-1r                | Pre-2r |     |     |
| Particles per classification                     | 73,086                | 87,706 |     |     |
| Resolution, FSC 0.143                            | 3.6                   | 3.6    |     |     |
| FCS map-to-model (0.5)                           | 3.6                   | 3.6    |     |     |
| Map sharpening B-factor ( $\text{\AA}^2$ )       | -75                   | -94    |     |     |
| <b>Model composition</b>                         |                       |        |     |     |
| Non-hydrogen atoms                               | 21539                 | 21276  |     |     |
| Protein residues                                 | 414                   | 414    |     |     |
| RNA bases                                        | 829                   | 818    |     |     |
| DNA bases                                        | 16                    | 15     |     |     |
| <b>Refinement (PHENIX)</b>                       |                       |        |     |     |
| Refinement package                               | Real space refinement |        |     |     |
| CC (volume)                                      | 0.80                  | 0.79   |     |     |
| CC (mask)                                        | 0.82                  | 0.80   |     |     |
| CC (peak)                                        | 0.75                  | 0.73   |     |     |
| <b>Rms deviations</b>                            |                       |        |     |     |
| Bond length ( $\text{\AA}$ )                     | 0.010                 | 0.01   |     |     |
| Bond angles ( $^\circ$ )                         | 1.154                 | 1.21   |     |     |
| <b>Validation</b>                                |                       |        |     |     |
| Molprobrity score                                | 2.24                  | 2.33   |     |     |
| All-atom clashscore                              | 13.72                 | 15.30  |     |     |
| Rotamer outliers (%)                             | 0.00                  | 0.00   |     |     |
| C-beta deviations                                | 0.00                  | 0.00   |     |     |
| EM-Ringer score                                  | 2.89                  | 2.53   |     |     |
| <b>Ramachandran plot</b>                         |                       |        |     |     |
| Outliers (%)                                     | 0.00                  | 0.00   |     |     |
| Allowed (%)                                      | 11.76                 | 13.73  |     |     |
| Favored (%)                                      | 88.24                 | 86.27  |     |     |
