# Supplementary material
Source: PubMed Central journal article supplement (PMC6662634)

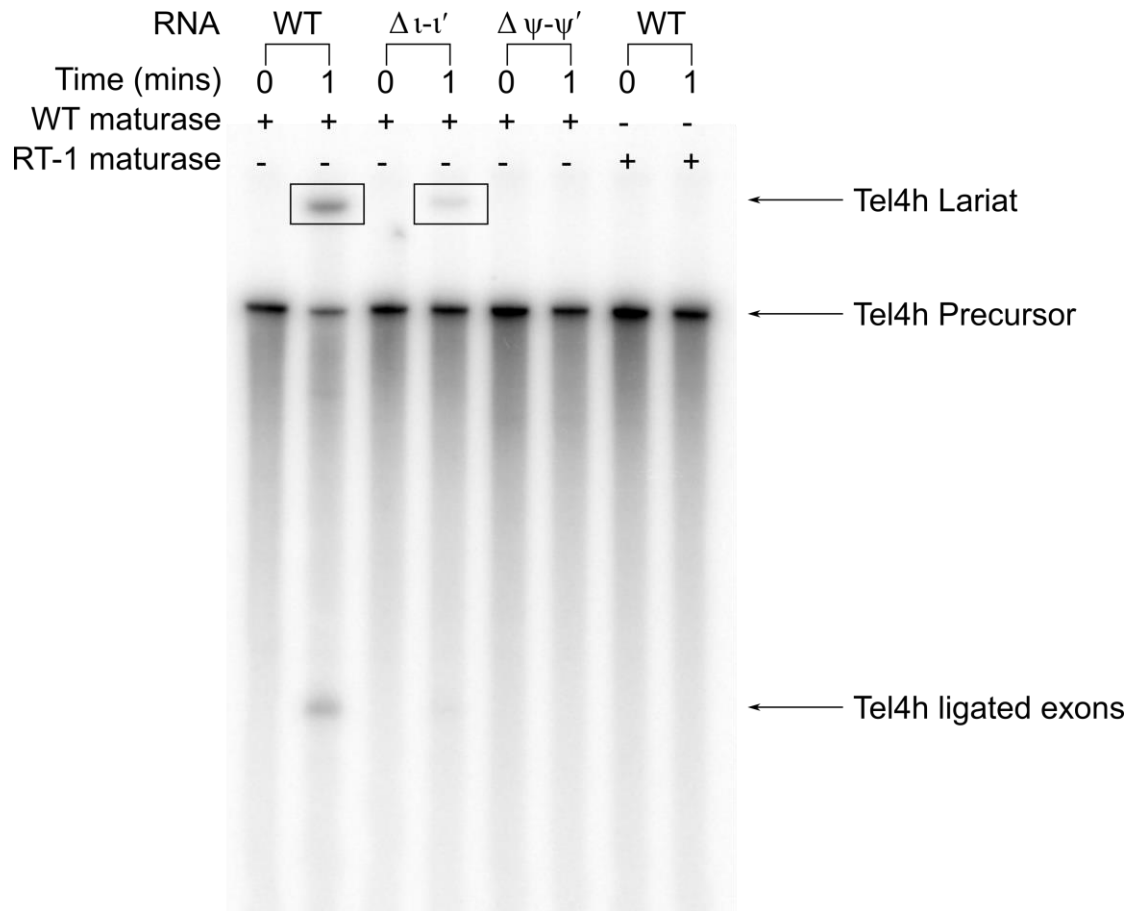

Supplement: NIHMS1533331-supplement-10.pdf [file NIHMS1533331-supplement-10.pdf]

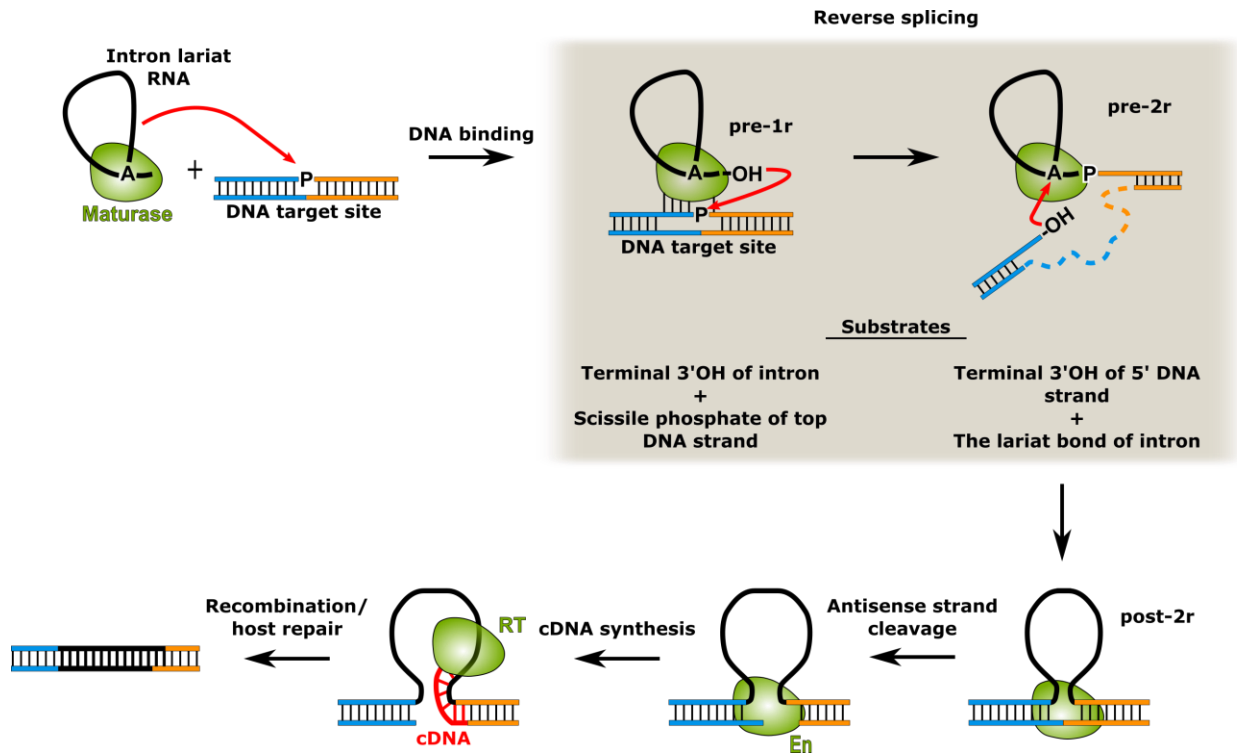

Supplement: NIHMS1533331-supplement-4.pdf [file NIHMS1533331-supplement-4.pdf]

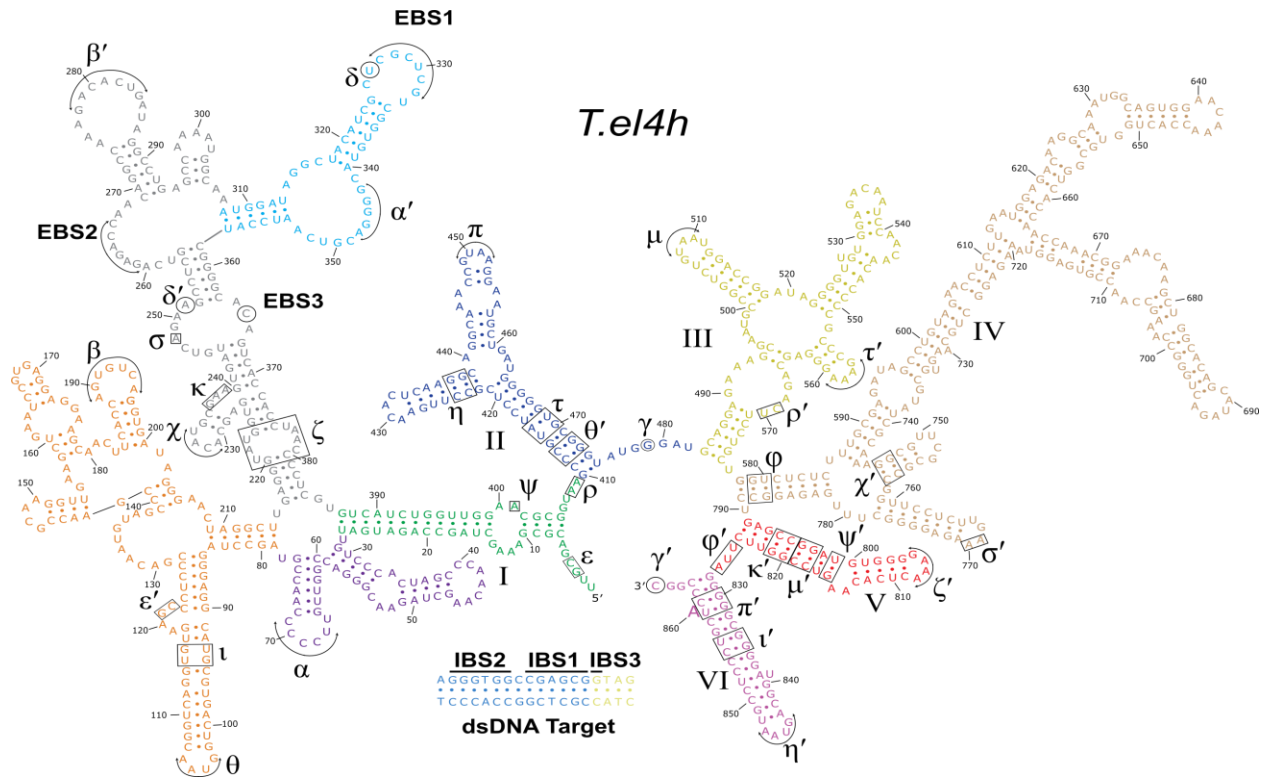

Supplement: NIHMS1533331-supplement-5.pdf [file NIHMS1533331-supplement-5.pdf]

**A**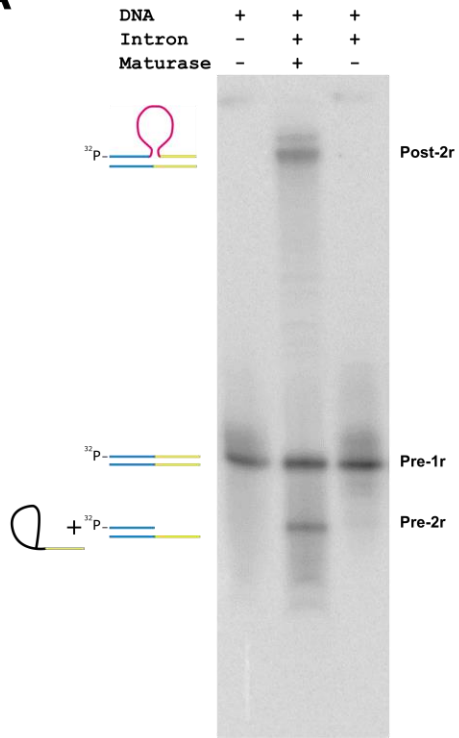**B**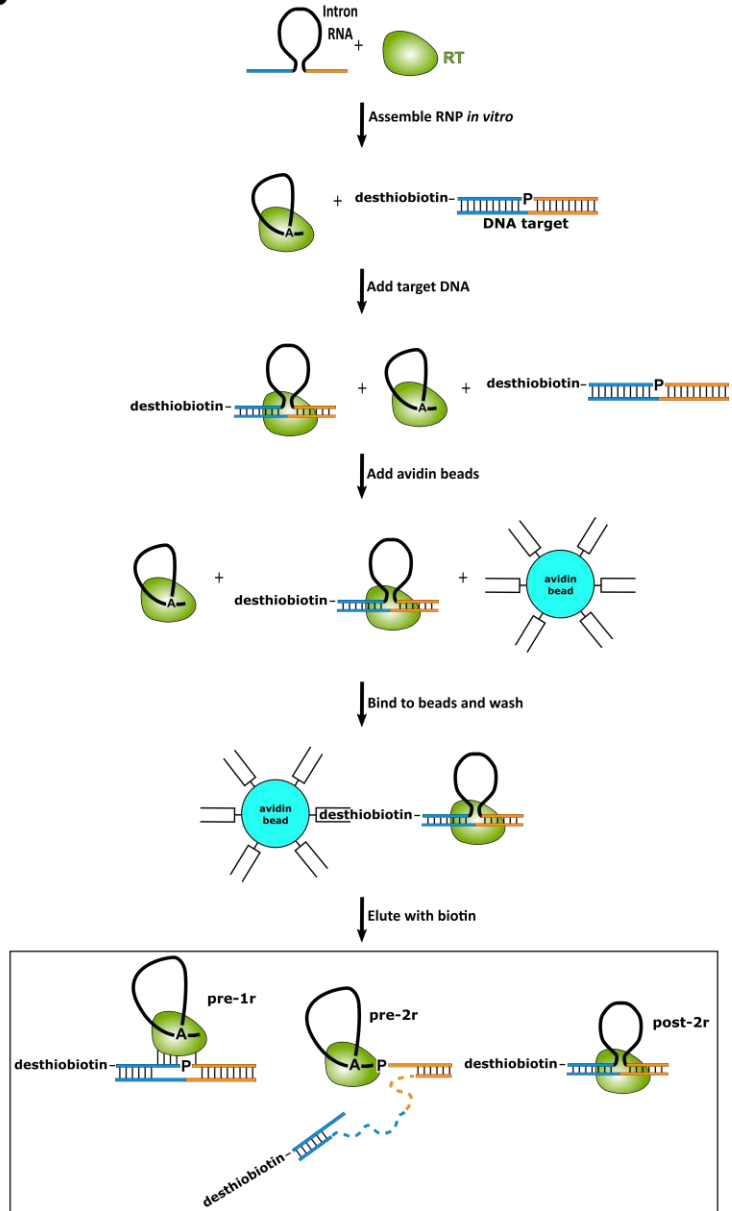

Supplement: NIHMS1533331-supplement-6.pdf [file NIHMS1533331-supplement-6.pdf]

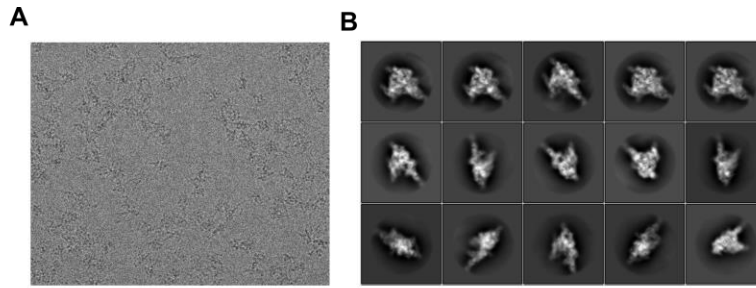

**C** 401,889 particles selected for 3D classification

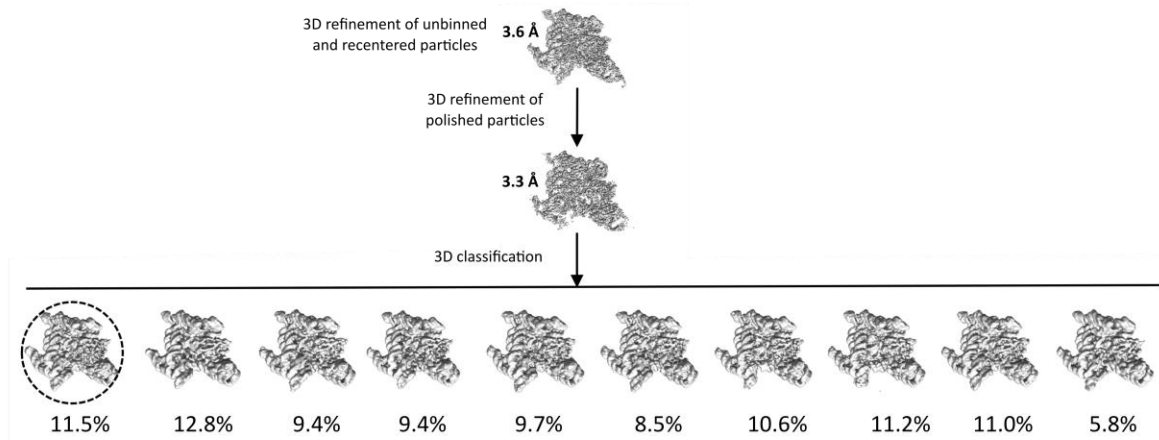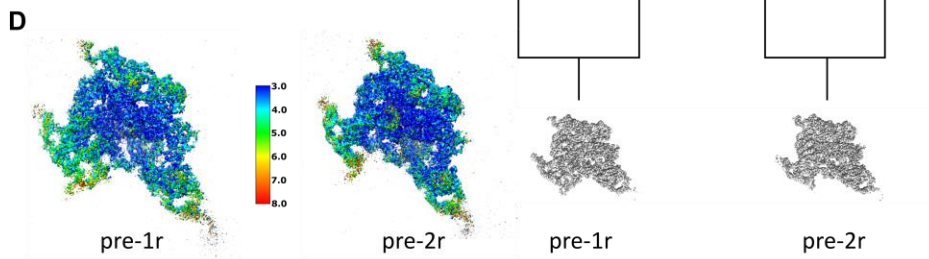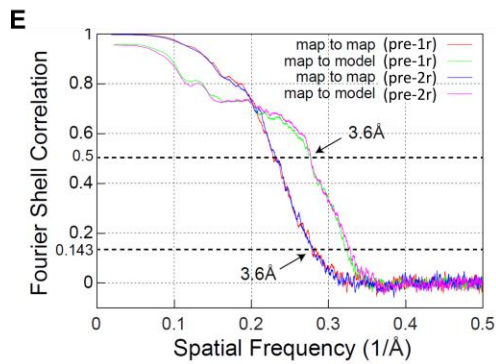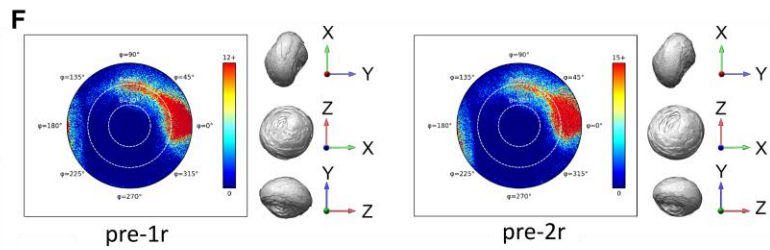

Supplement: NIHMS1533331-supplement-7.pdf [file NIHMS1533331-supplement-7.pdf]

■ DV pre-1r  
■ DV pre-2r

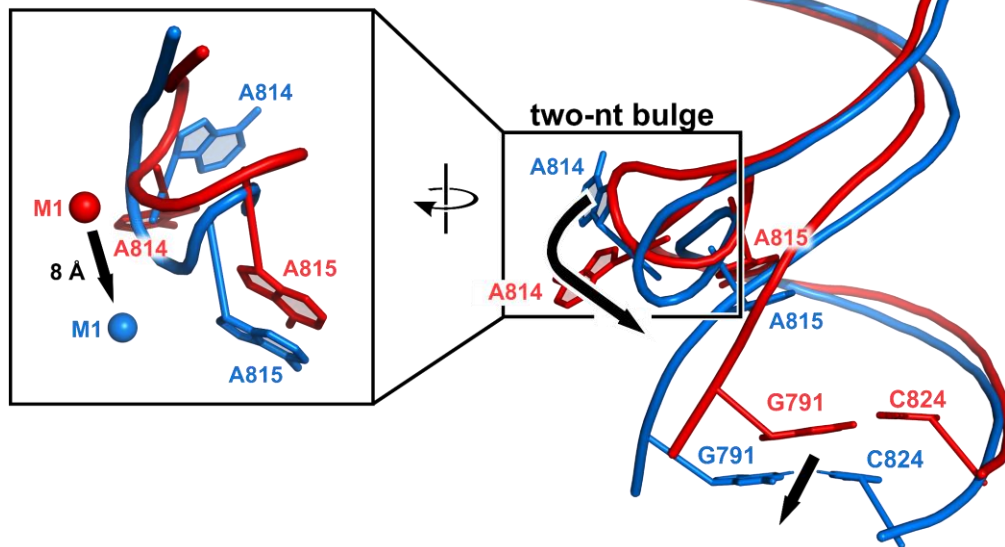

| Residue | Backbone RMSD (Å) |
|---------|-------------------|
| G791    | 5.1               |
| A792    | 5.9               |
| G793    | 4.6               |
| C794    | 5.1               |
| C795    | 5.9               |
| G796    | 6.6               |
| G797    | 6.9               |
| A798    | 7.2               |
| U799    | 6.0               |
| G800    | 4.4               |
| U801    | 3.0               |
| G802    | 2.2               |
| G803    | 1.4               |
| G804    | 0.8               |
| G805    | 0.9               |
| A806    | 0.7               |
| A807    | 0.5               |
| A808    | 0.6               |
| C809    | 1.2               |
| U810    | 1.7               |
| C811    | 1.3               |
| A812    | 1.3               |
| C813    | 2.3               |
| A814    | 2.8               |
| A815    | 3.6               |
| G816    | 2.4               |
| U817    | 3.2               |
| C818    | 4.4               |
| C819    | 5.4               |
| G820    | 6.1               |
| G821    | 6.7               |
| U822    | 7.0               |
| U823    | 7.4               |
| C824    | 7.5               |
| Avg.    | 3.9               |

Supplement: NIHMS1533331-supplement-8.pdf [file NIHMS1533331-supplement-8.pdf]

**A**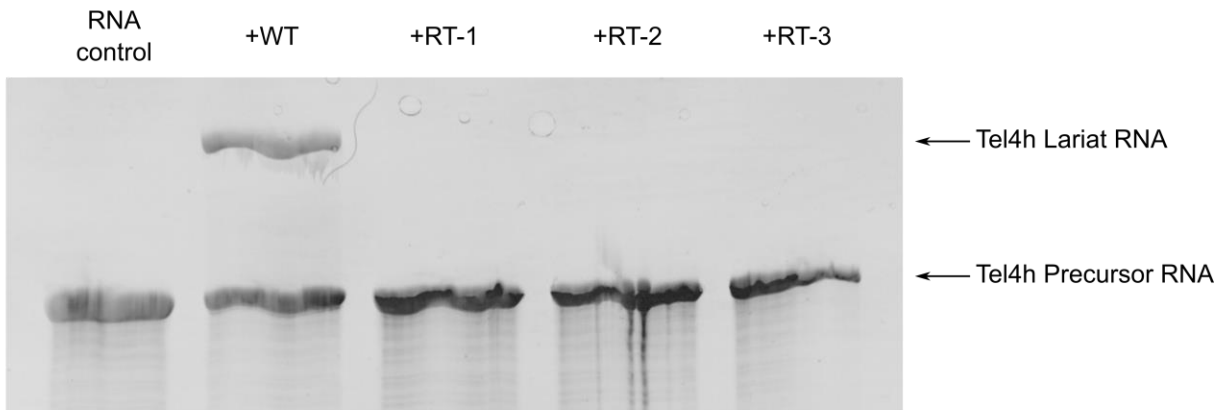**B**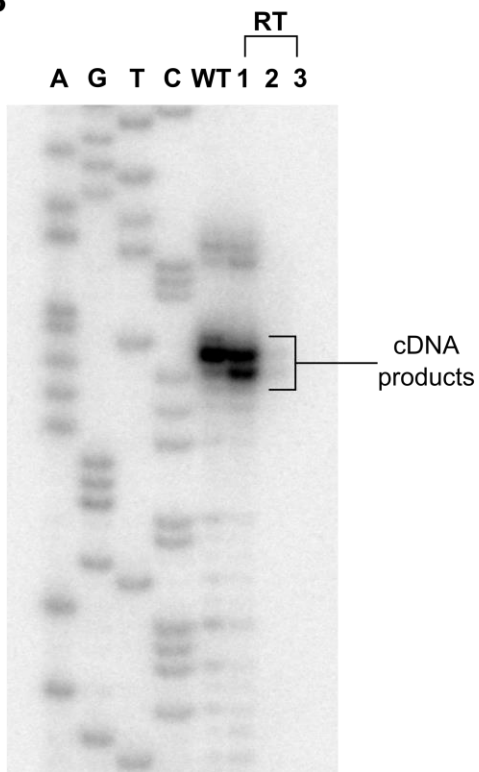**C**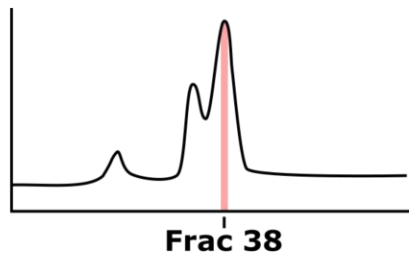**D**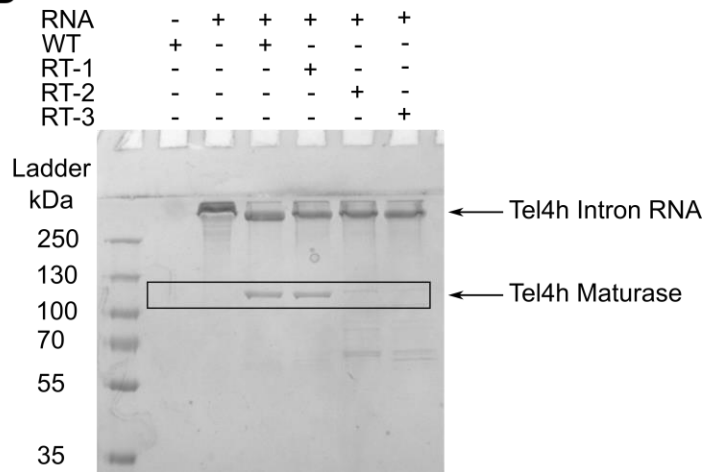

Supplement: NIHMS1533331-supplement-9.pdf [file NIHMS1533331-supplement-9.pdf]
